# Supplementary figures and images for: HER2 Heterogeneity Is Associated with Poor Survival in HER2-Positive Breast Cancer
Source: MDPI journal article supplement (doi:10.3390/ijms19082158), 2018-07-24

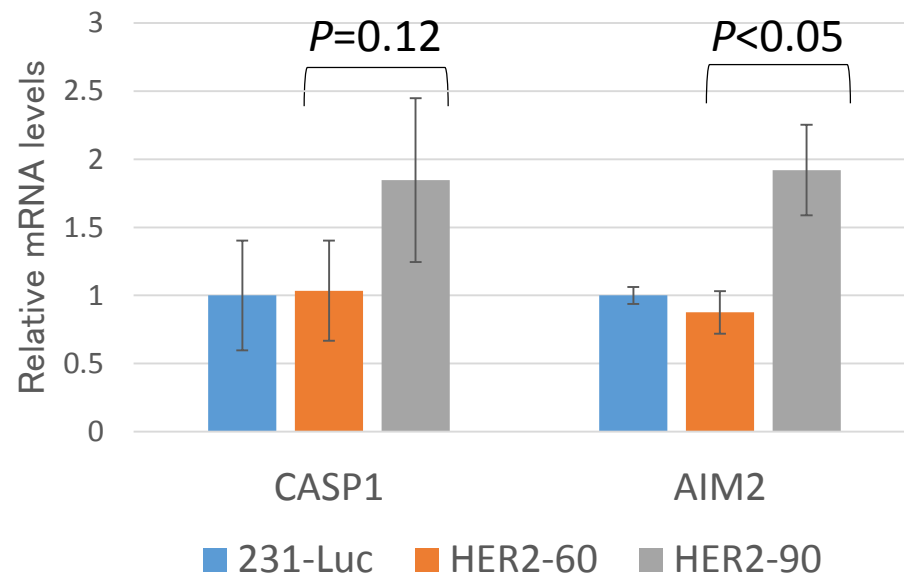

Supplement: s1 [file s1]
